# Supplementary material for: Perturbation-based balance training targeting both slip- and trip-induced falls among older adults: a randomized controlled trial
Source: PubMed Central journal article supplement (PMC7291462; doi:10.1186/s12877-020-01605-9), 2020-06-12
Supplement: 12877_2020_1605_MOESM1_ESM.pdf [file 12877_2020_1605_MOESM1_ESM.pdf]

Supplemental Statistical Results and Results Plots for:  
*Perturbation-based Balance Training Targeting Both Slip- and Trip-Induced Falls Among Older Adults:  
a Randomized Controlled Trial*

Table S1 - Additional statistical results for participant characteristics among the three slip groups.

|                                        | <i>f</i> -statistic | df <sub>num</sub> | df <sub>den</sub> | <i>p</i> -value | eta squared |
|----------------------------------------|---------------------|-------------------|-------------------|-----------------|-------------|
| Age (years)                            | 1.877               | 2                 | 9.965             | 0.203           | 0.119       |
| Height (m)                             | 0.333               | 2                 | 10.432            | 0.724           | 0.027       |
| Mass (kg)                              | 0.881               | 2                 | 11.162            | 0.441           | 0.072       |
| IPAQ (MET minutes per week)            | 1.536               | 2                 | 8.862             | 0.268           | 0.164       |
| Timed-up-and-go (s)                    | 0.924               | 2                 | 11.188            | 0.425           | 0.072       |
| POMA (0-28 [best])                     | 0.944               | 2                 | 12.501            | 0.415           | 0.056       |
| Falls efficacy scale (10 [best] - 100) | k                   | k                 | k                 | 0.332           | k           |

Note: IPAQ = International Physical Activity Questionnaire, short form; POMA = performance-oriented mobility assessment; k indicates Kruskal-Wallis Test was used.

Table S2 - Additional statistical results for gait characteristics and reactive balance measures among the three slip groups.

|                                                 | <i>f</i> -statistic | df <sub>num</sub> | df <sub>den</sub> | <i>p</i> -value | eta squared |
|-------------------------------------------------|---------------------|-------------------|-------------------|-----------------|-------------|
| <i>Gait Characteristics Before Slipping</i>     |                     |                   |                   |                 |             |
| Gait speed (m/s)                                | 1.293               | 2                 | 10.582            | 0.314           | 0.097       |
| Step length (%BH)                               | 0.679               | 2                 | 9.739             | 0.530           | 0.052       |
| Minimum toe clearance (mm)                      | 1.719               | 2                 | 9.564             | 0.230           | 0.143       |
| Required coefficient of friction                | 0.287               | 2                 | 9.771             | 0.757           | 0.025       |
| <i>Reactive Balance in Response to Slipping</i> |                     |                   |                   |                 |             |
| Peak slip speed (m/s)                           | 4.255               | 2                 | 11.599            | <b>0.041</b>    | 0.266       |
| Slip distance (cm)                              | 1.161               | 2                 | 11.946            | 0.346           | 0.087       |
| Non-slipping toe to COM at TD (%BH)             | 0.742               | 2                 | 11.262            | 0.498           | 0.054       |
| Minimum hip height (%)                          | 4.706               | 2                 | 10.206            | <b>0.036</b>    | 0.273       |
| Margin of stability at TD (cm)                  | 5.299               | 2                 | 10.158            | <b>0.027</b>    | 0.266       |
| vCOM relative to BOS at TD (m/s)                | 10.272              | 2                 | 10.232            | <b>0.004</b>    | 0.416       |

Note: Bold indicates statistically significant main effect of slip group. Minimum hip height is expressed as a percentage of standing hip height. BH = body height; COM = center of mass; TD = touch down of non-slipping foot after reactive stepping; vCOM = anterior-posterior velocity of the COM; BOS = base of support.

Table S3 - Additional statistical results for participant characteristics among the three trip groups.

|                                        | <i>f</i> -statistic | df <sub>num</sub> | df <sub>den</sub> | <i>p</i> -value | eta squared |
|----------------------------------------|---------------------|-------------------|-------------------|-----------------|-------------|
| Age (years)                            | 2.689               | 2                 | 10.577            | 0.114           | 0.180       |
| Height (m)                             | 1.510               | 2                 | 14.829            | 0.253           | 0.072       |
| Mass (kg)                              | 0.310               | 2                 | 10.925            | 0.740           | 0.023       |
| IPAQ (MET minutes per week)            | 0.531               | 2                 | 11.470            | 0.602           | 0.032       |
| Timed-up-and-go (s)                    | 2.998               | 2                 | 14.632            | 0.081           | 0.077       |
| POMA (0-28 [best])                     | 1.677               | 2                 | 11.712            | 0.229           | 0.103       |
| Falls Efficacy Scale (10 [best] - 100) | 0.876               | 2                 | 9.281             | 0.448           | 0.058       |

Note: IPAQ = International Physical Activity Questionnaire, short form; MET = metabolic equivalent of task; POMA = performance-oriented mobility assessment.

Table S4 - Additional statistical results for gait characteristics and reactive balance measures among the three trip groups.

|                                                 | <i>f</i> -statistic | df <sub>num</sub> | df <sub>den</sub> | <i>p</i> -value | eta squared |
|-------------------------------------------------|---------------------|-------------------|-------------------|-----------------|-------------|
| <i>Gait Characteristics Before Tripping</i>     |                     |                   |                   |                 |             |
| Gait speed (m/s)                                | 0.696               | 2                 | 9.743             | 0.522           | 0.048       |
| Step length (%BH)                               | 2.260               | 2                 | 9.605             | 0.157           | 0.183       |
| Minimum toe clearance (mm)                      | 0.047               | 2                 | 10.565            | 0.955           | 0.004       |
| Required coefficient of friction                | 3.702               | 2                 | 12.806            | 0.054           | 0.154       |
| Gait phase at trip onset (% swing)              | 0.637               | 2                 | 9.392             | 0.550           | 0.053       |
| <i>Reactive Balance in Response to Tripping</i> |                     |                   |                   |                 |             |
| Trunk angle at TD (deg)                         | 3.362               | 2                 | 16.597            | 0.059           | 0.058       |
| Recovery step length (%BH)                      | 2.343               | 2                 | 12.424            | 0.137           | 0.119       |
| Minimum hip height (% standing hip)             | 0.828               | 2                 | 9.815             | 0.465           | 0.053       |
| Margin of stability at TD (cm)                  | 2.768               | 2                 | 9.563             | 0.113           | 0.219       |

Note: BH = body height; TD = touch down of first step over trip obstacle. A less negative margin of stability indicates the center of mass is outside of (and posterior to) the base of support, but closer to the boundary of the base of support.

### Gait characteristics before slipping

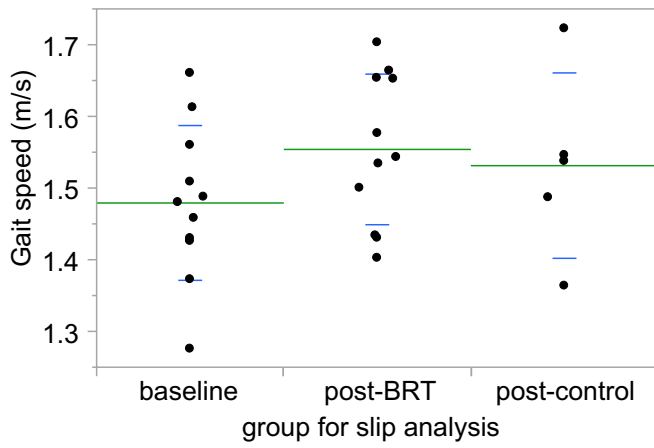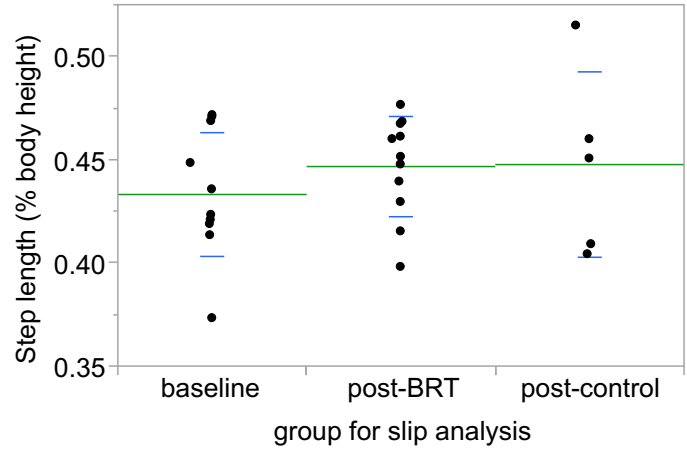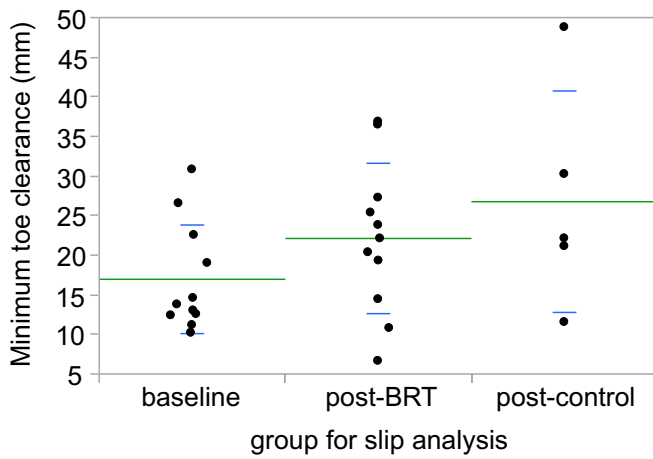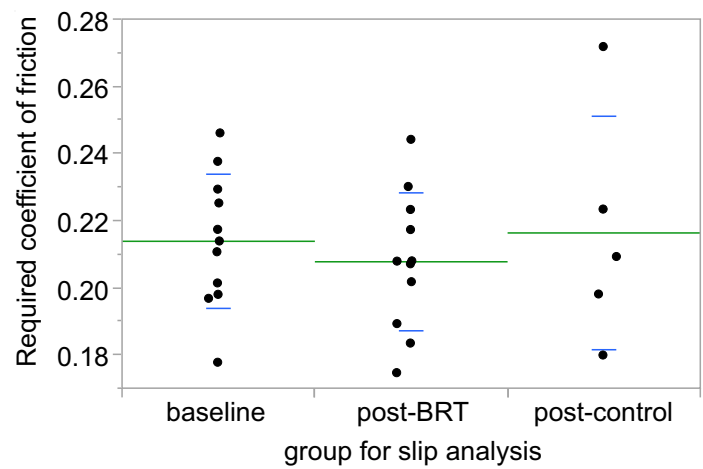

Note: Wide green horizontal lines indicate group means. Narrow blue horizontal lines indicate standard deviations.

## Gait characteristics before tripping

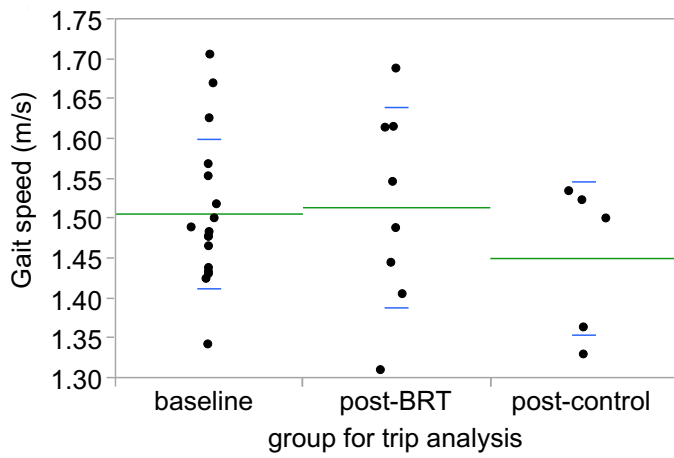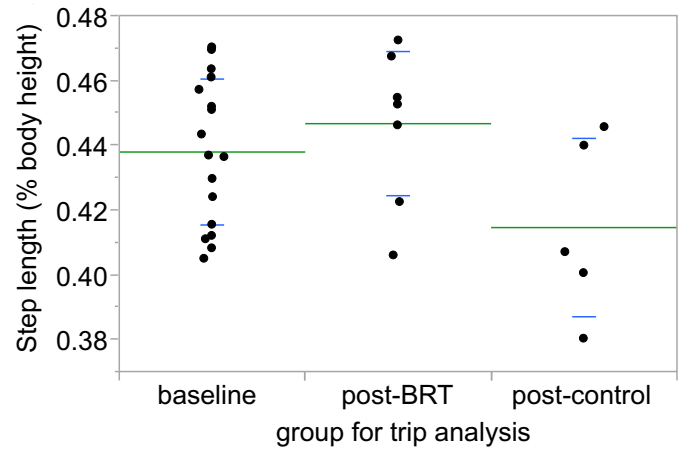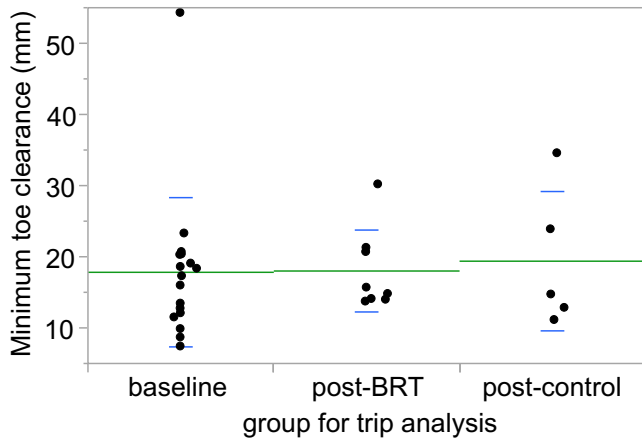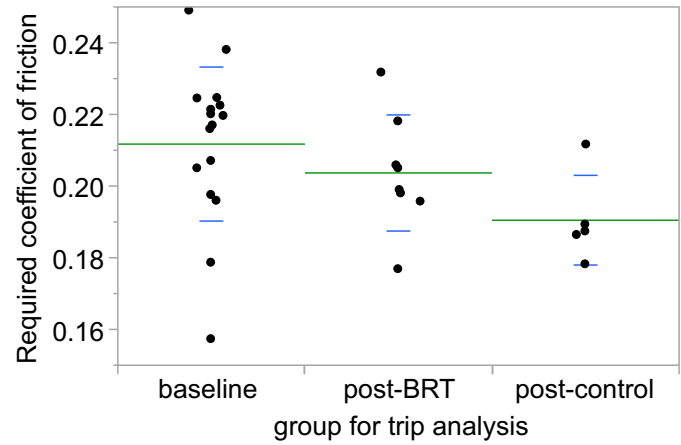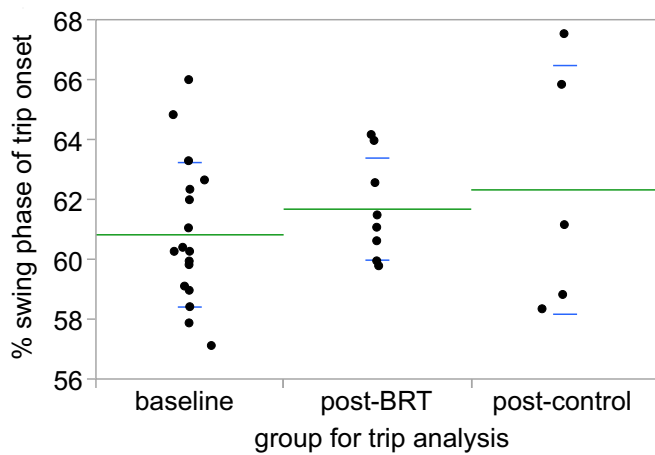

Note: Wide green horizontal lines indicate group means. Narrow blue horizontal lines indicate standard deviations.

## Participant characteristics for the three slipping groups

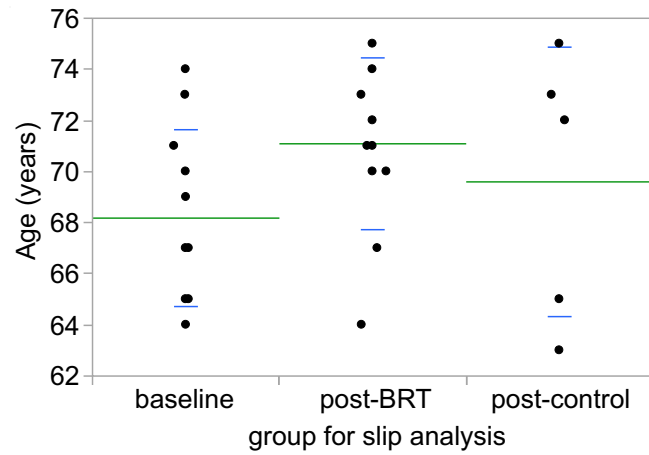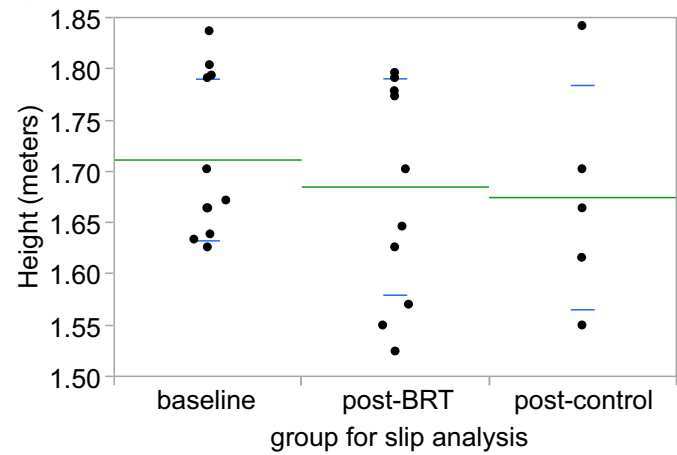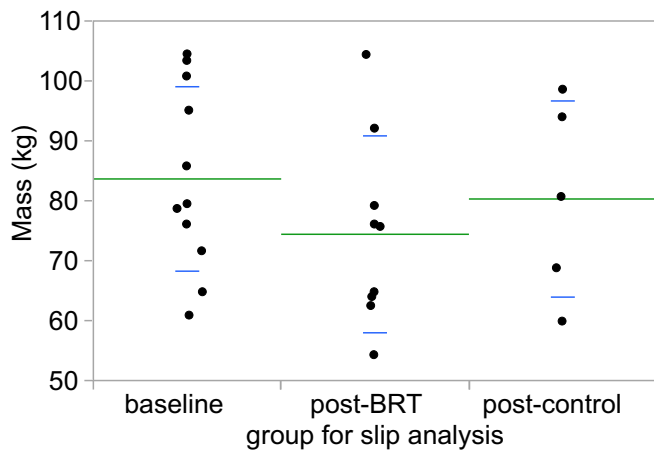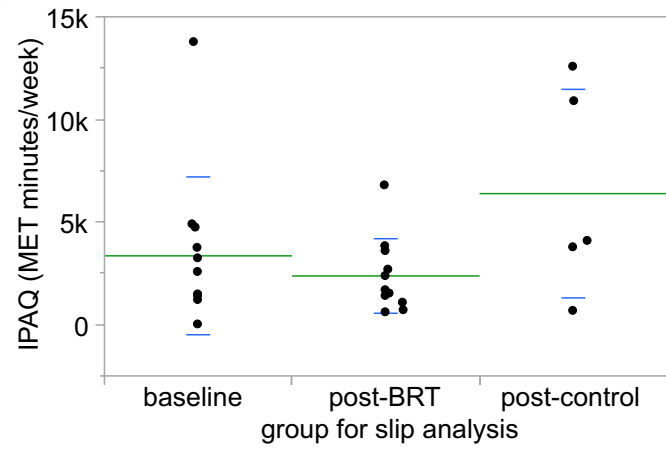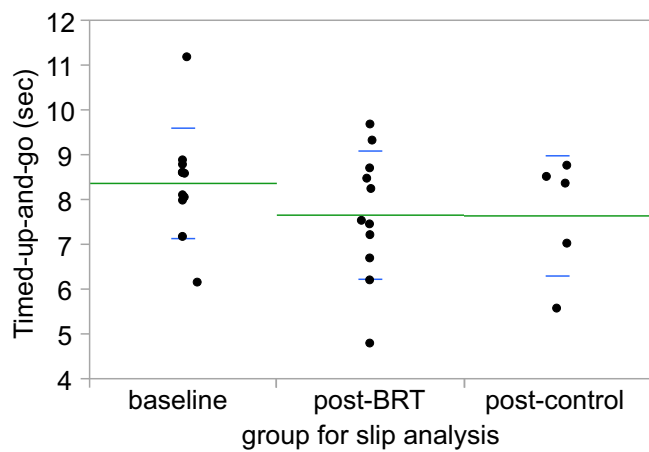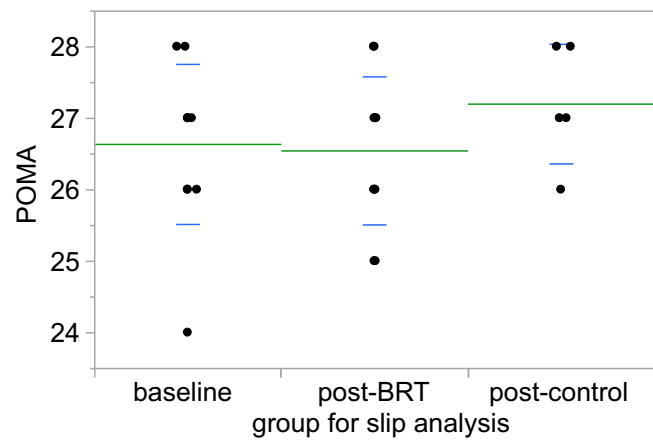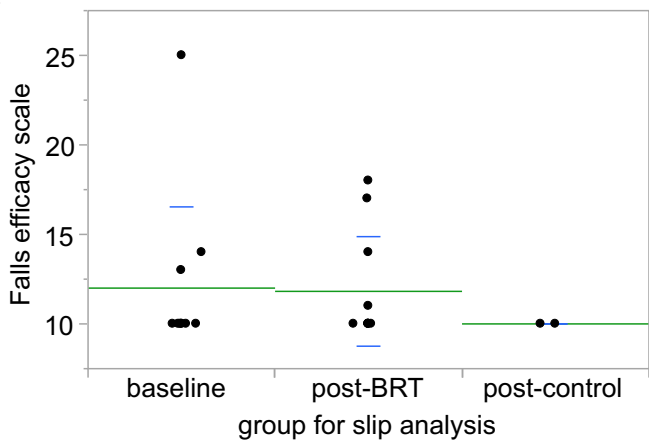

Note: Wide green horizontal lines indicate group means. Narrow blue horizontal lines indicate standard deviations. IPAQ = International Physical Activity Questionnaire; POMA = Performance-oriented mobility assessment.

## Participant characteristics for the three trip groups

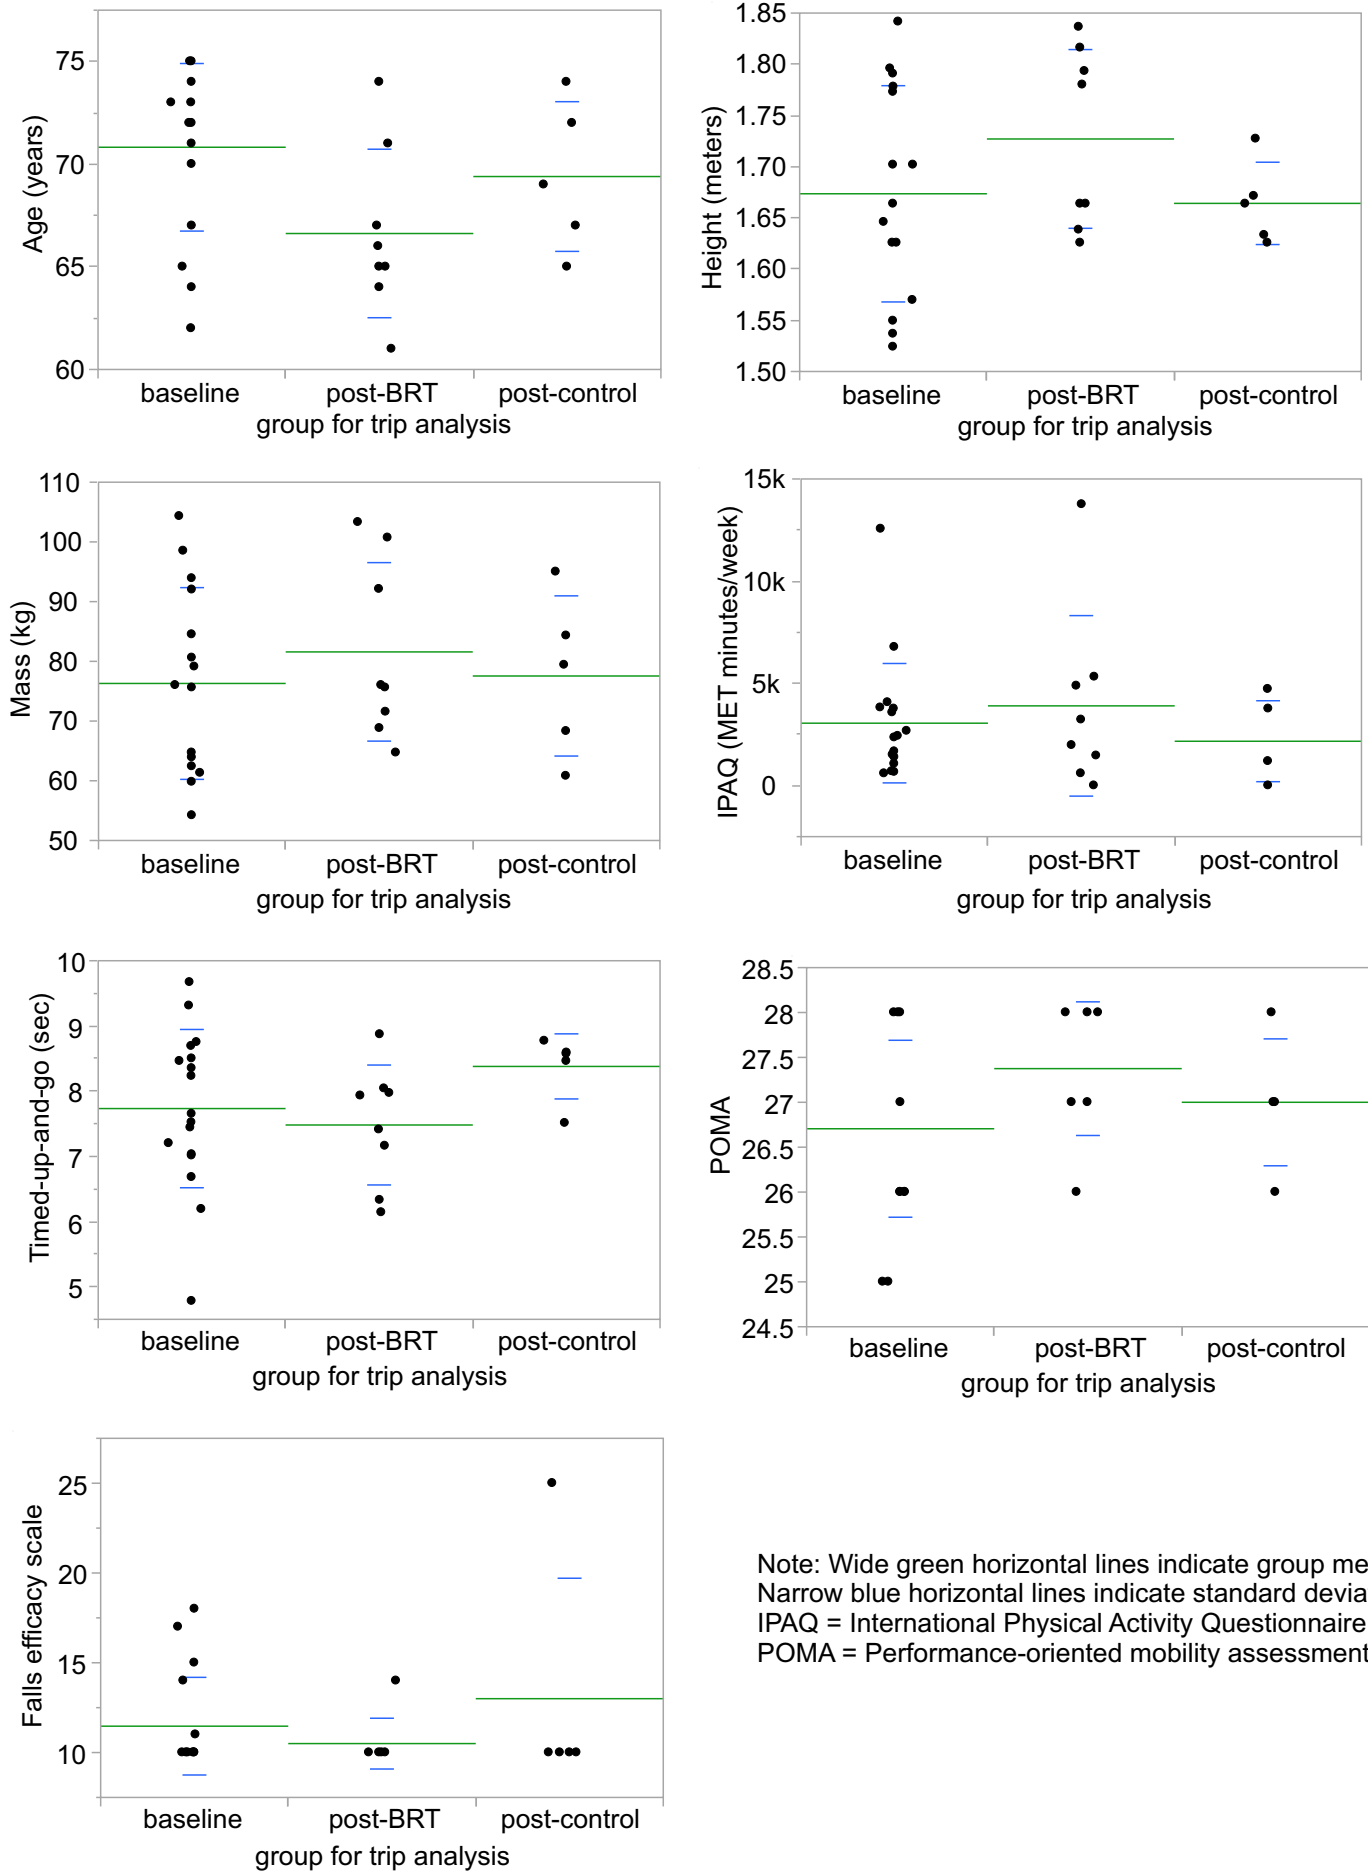

Note: Wide green horizontal lines indicate group means. Narrow blue horizontal lines indicate standard deviations. IPAQ = International Physical Activity Questionnaire; POMA = Performance-oriented mobility assessment.

## Reactive balance measures after slipping

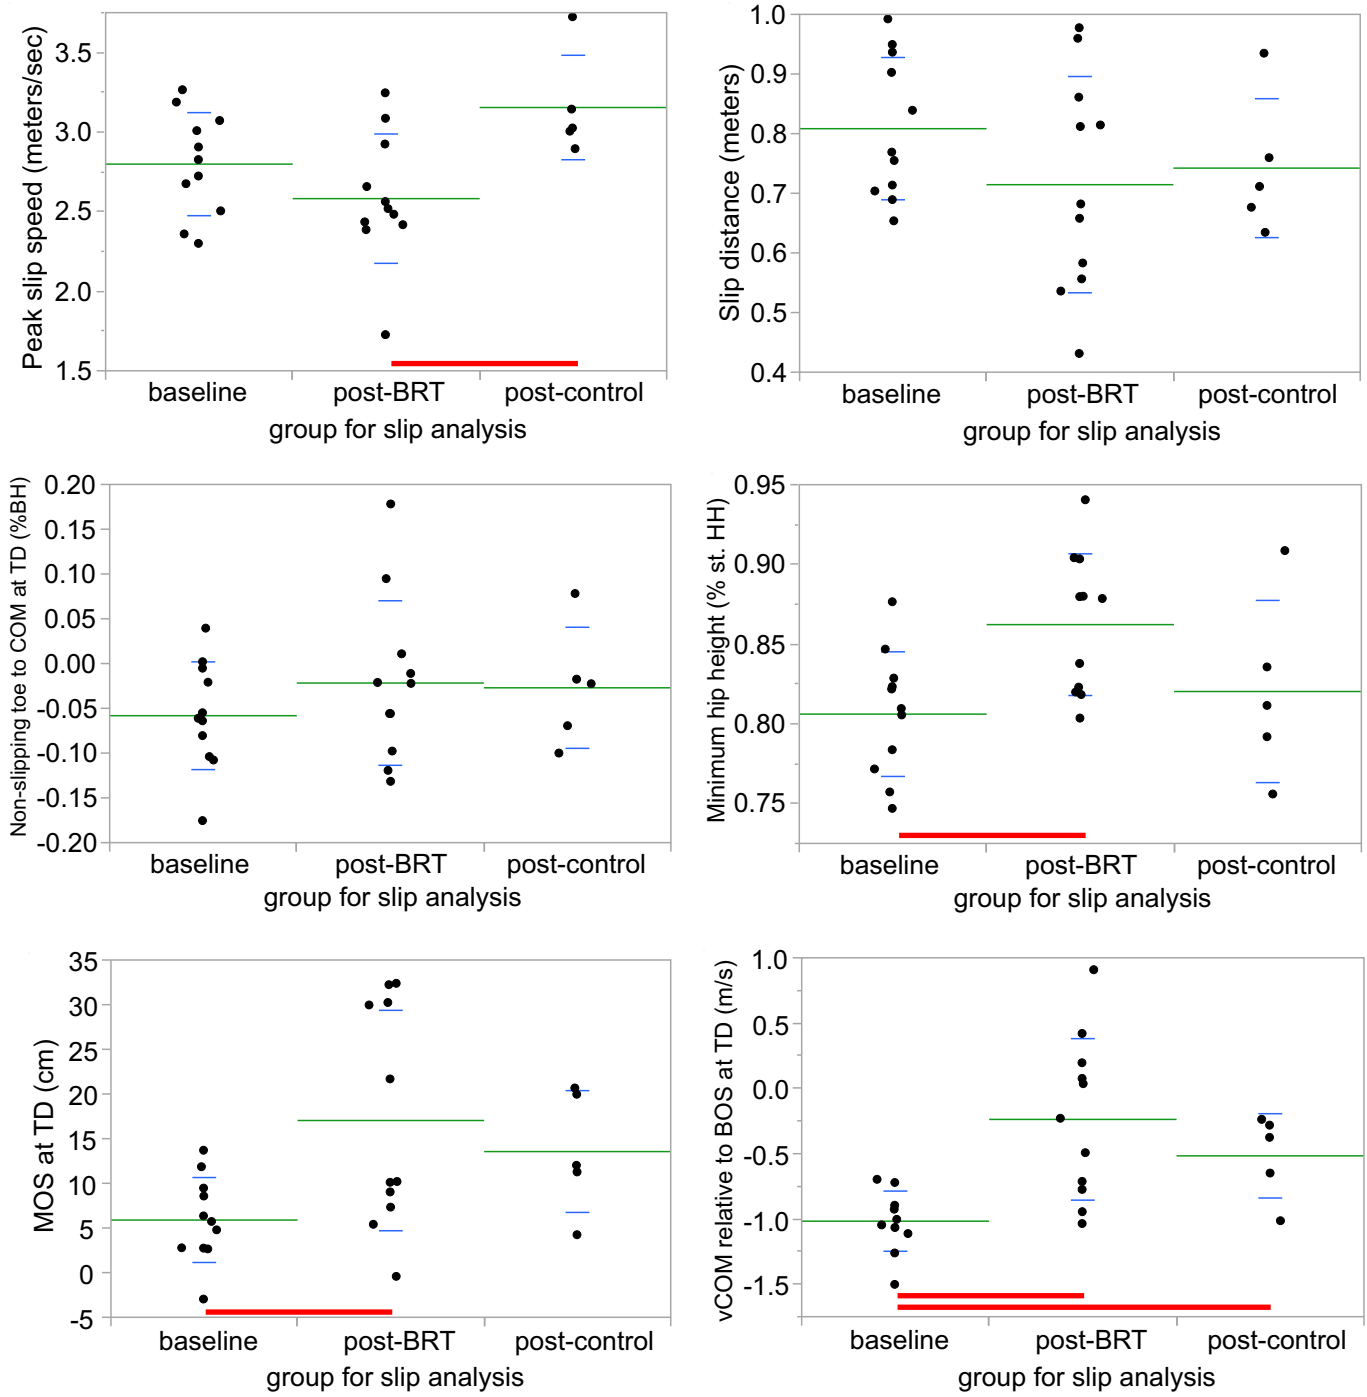

Note: Wide green horizontal lines indicate group means. Narrow blue horizontal lines indicate standard deviations. Red lines indicate statistical difference between groups connected at endpoints. COM = center of mass; TD = touchdown of initial balance recovery step; BH = body height; st. HH = standing hip height; MOS = margin of stability; vCOM = velocity of center of mass; BOS = base of support.

### Reactive balance measures after tripping

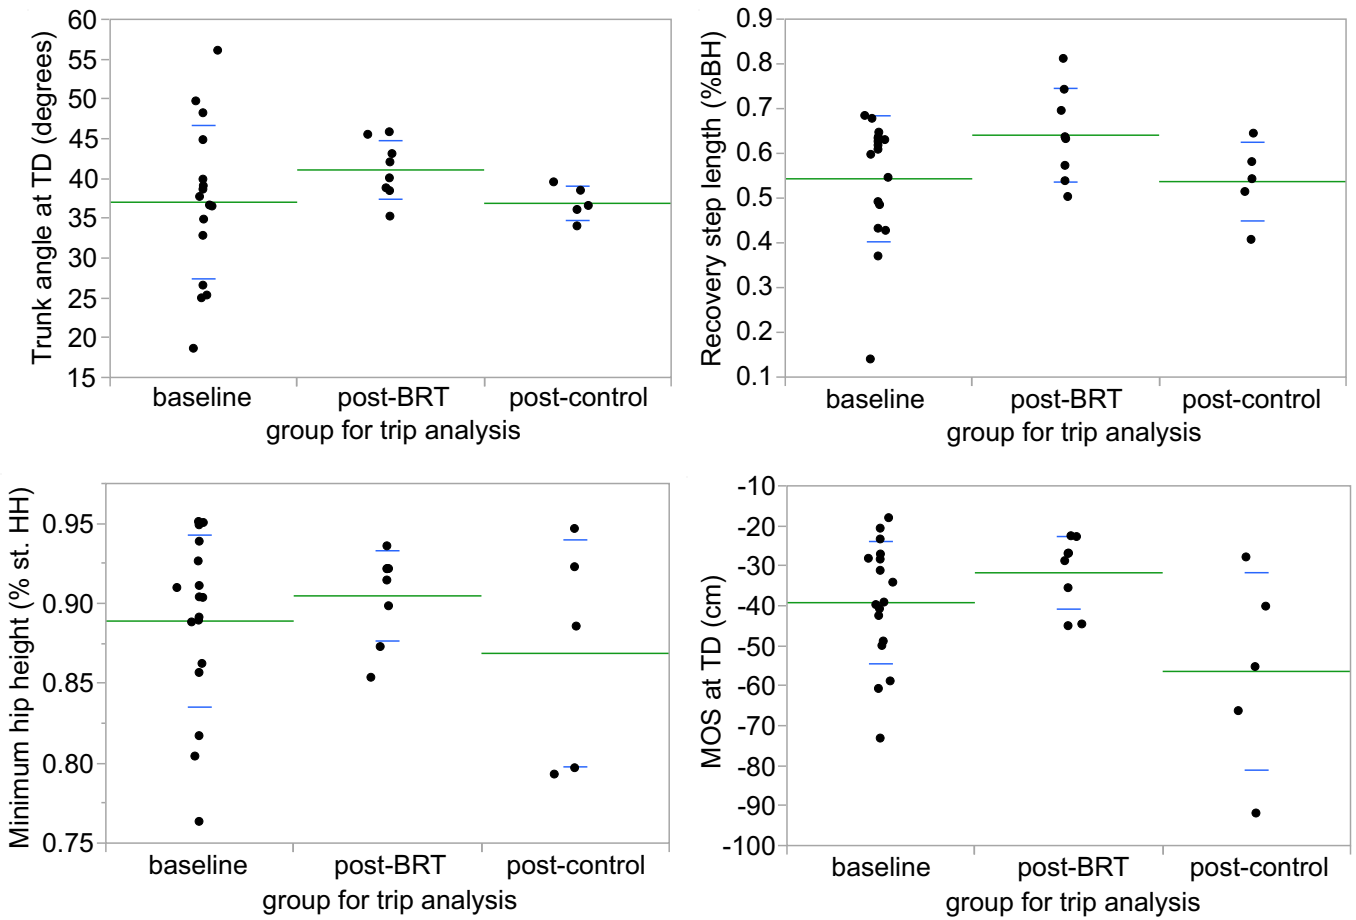

Note: Wide green horizontal lines indicate group means. Narrow blue horizontal lines indicate standard deviations. TD = touchdown of initial balance recovery step; BH = body height; st. HH = standing hip height; MOS = margin of stability.
